# Supplementary material
Source: PubMed Central journal article supplement (PMC5016063)
Supplement: supp_the2015-0478_Supplemental_Tables.pdf [file supp_the2015-0478_Supplemental_Tables.pdf]

Supplemental Tables for:  
Sorafenib Effectiveness in Advanced Hepatocellular Carcinoma  
Hanna K Sanoff et al.

**Supplemental Table 1:** Covariate Balance Following Propensity Score Matching

| Characteristic                           | Before Matching             |                          | p-value | After Matching        |                    | P-value |
|------------------------------------------|-----------------------------|--------------------------|---------|-----------------------|--------------------|---------|
|                                          | No Treatment<br>n=565 (70%) | Sorafenib<br>N=242 (30%) |         | No Treatment<br>N=223 | Sorafenib<br>N=223 |         |
| <b>Year of Diagnosis</b>                 |                             |                          |         |                       |                    |         |
| 2008                                     | 141 (25%)                   | 44 (18%)                 | 0.003   | 43 (19%)              | 43 (19%)           | 0.855   |
| 2009                                     | 164 (29%)                   | 53 (22%)                 |         | 56 (25%)              | 52 (23%)           |         |
| 2010                                     | 131 (23%)                   | 66 (27%)                 |         | 64 (29%)              | 60 (27%)           |         |
| 2011                                     | 129 (23%)                   | 79 (33%)                 |         | 60 (27%)              | 68 (30%)           |         |
| <b>Age</b>                               |                             |                          |         |                       |                    |         |
| Median (Q1, Q3)                          | 74 (67, 82)                 | 70 (64, 77)              |         | 71 (64, 79)           | 70 (64, 78)        |         |
| less than 64                             | 119 (21%)                   | 63 (26%)                 | <.001   | 56 (25%)              | 58 (26%)           | 0.890   |
| 65-74 yr                                 | 181 (32%)                   | 99 (41%)                 |         | 93 (42%)              | 88 (39%)           |         |
| 75+ yr                                   | 265 (47%)                   | 80 (33%)                 |         | 74 (33%)              | 77 (35%)           |         |
| <b>Sex</b>                               |                             |                          |         |                       |                    |         |
| Male                                     | 380 (67%)                   | 186 (77%)                | 0.006   | 162 (73%)             | 168 (75%)          | 0.517   |
| Female                                   | 185 (33%)                   | 56 (23%)                 |         | 61 (27%)              | 55 (25%)           |         |
| <b>Race</b>                              |                             |                          |         |                       |                    |         |
| White                                    | 346 (61%)                   | 139 (57%)                | 0.467   | 138 (62%)             | 128 (57%)          | 0.743   |
| African American                         | 67 (12%)                    | 38 (16%)                 |         | 30 (13%)              | 36 (16%)           |         |
| Asian                                    | 73 (13%)                    | 29 (12%)                 |         | 23 (10%)              | 27 (12%)           |         |
| Other                                    | 79 (14%)                    | 36 (15%)                 |         | 32 (14%)              | 32 (14%)           |         |
| <b>Marital Status</b>                    |                             |                          |         |                       |                    |         |
| Married                                  | 208 (37%)                   | 115 (48%)                | 0.011   | 98 (44%)              | 102 (46%)          | 0.858   |
| Separated/Divorced/Widowed               | 231 (41%)                   | 71 (29%)                 |         | 72 (32%)              | 69 (31%)           |         |
| Single                                   | 100 (18%)                   | 43 (18%)                 |         | 53 (24%)              | 40 (18%)           |         |
| Other/Unknown                            | 26 (5%)                     | 13 (5%)                  |         | †                     | 12 (5%)            |         |
| <b>Census Tract Region</b>               |                             |                          |         |                       |                    |         |
| Metro                                    | 482 (85%)                   | 221 (91%)                | 0.053   | 201 (90%)             | 202 (91%)          | 0.966   |
| Urban                                    | 35 (6%)                     | 21 (9%)                  |         | 22 (10%)              | 21 (9%)            |         |
| Rural                                    | 48 (8%)                     | †                        |         | †                     | †                  |         |
| <b>Census Tract % Below Poverty Line</b> |                             |                          |         |                       |                    |         |
| 1 <sup>st</sup> Quartile (lowest)        | 119 (21%)                   | 67 (28%)                 | 0.118   | 66 (30%)              | 59 (26%)           | 0.409   |

|                                         |           |           |       |           |           |       |
|-----------------------------------------|-----------|-----------|-------|-----------|-----------|-------|
| 2 <sup>nd</sup> Quartile                | 137 (25%) | 51 (21%)  |       | 48 (22%)  | 48 (22%)  |       |
| 3 <sup>rd</sup> Quartile                | 158 (28%) | 56 (23%)  |       | 39 (17%)  | 53 (24%)  |       |
| 4 <sup>th</sup> Quartile (highest)      | 141 (25%) | 67 (28%)  |       | 70 (31%)  | 63 (28%)  |       |
| Modified Charlson Score                 |           |           |       |           |           |       |
| 0                                       | 52 (9%)   | 28 (12%)  | 0.129 | 20 (9%)   | 24 (11%)  | 0.817 |
| 1                                       | 76 (13%)  | 43 (18%)  |       | 39 (17%)  | 38 (17%)  |       |
| 2+                                      | 437 (77%) | 171 (71%) |       | 164 (74%) | 161 (72%) |       |
| Number of Liver Comorbidities           |           |           |       |           |           |       |
| Mean (STD)                              | 0.9 (1.2) | 0.6 (1.1) | 0.001 | 0.6 (0.9) | 0.7 (1.1) | 0.816 |
| Prior AFP Screening                     |           |           |       |           |           |       |
| 0                                       | 360 (64%) | 133 (55%) | 0.054 | 137 (61%) | 126 (57%) | 0.537 |
| 1                                       | 102 (18%) | 58 (24%)  |       | 43 (19%)  | 51 (23%)  |       |
| 2+                                      | 103 (18%) | 51 (21%)  |       | 43 (19%)  | 46 (21%)  |       |
| Hepatitis B Virus                       | 42 (7%)   | 26 (11%)  | 0.121 | 21 (9%)   | 19 (9%)   | 0.740 |
| Hepatitis C Virus                       | 174 (31%) | 76 (31%)  | 0.864 | 64 (29%)  | 71 (32%)  | 0.471 |
| Alcoholic Liver Disease                 | 86 (15%)  | 31 (13%)  | 0.373 | 24 (11%)  | 29 (13%)  | 0.464 |
| Other Cause of Liver Disease            | 76 (13%)  | 27 (11%)  | 0.371 | 26 (12%)  | 26 (12%)  | 1.000 |
| Tumor Extent                            |           |           |       |           |           |       |
| Multiple lesions, no vascular invasion  | 231 (41%) | 117 (48%) | <.001 | 107 (48%) | 104 (47%) | 0.852 |
| Multiple lesions with vascular invasion | 93 (16%)  | 57 (24%)  |       | 48 (22%)  | 53 (24%)  |       |
| Extension beyond liver, NOS             | 241 (43%) | 68 (28%)  |       | 68 (30%)  | 66 (30%)  |       |
| Maximum Tumor Size                      |           |           |       |           |           |       |
| <= 3cm                                  | 61 (11%)  | 35 (14%)  | <.001 | 30 (14%)  | 34 (15%)  | 0.939 |
| 3 to 5cm                                | 74 (13%)  | †         |       | †         | †         |       |
| > 5cm                                   | 195 (35%) | 123 (51%) |       | 107 (48%) | 108 (48%) |       |
| Unknown                                 | 235 (42%) | 84 (35%)  |       | 86 (39%)  | 81 (36%)  |       |

† n<11. Cell merged with above to preserve confidentiality.

**Table S2:** Characteristics of Initial versus Subsequent Sorafenib Users

| <b>A</b>                   | <b>Initial Sorafenib<br/>N=422</b> | <b>Subsequent Sorafenib<br/>N=232</b> | <b>p-value</b> |
|----------------------------|------------------------------------|---------------------------------------|----------------|
| <b>Year of Diagnosis</b>   |                                    |                                       |                |
| 2008                       | 90 (21%)                           | 54 (23%)                              | 0.680*         |
| 2009                       | 106 (25%)                          | 65 (28%)                              |                |
| 2010                       | 100 (24%)                          | 52 (22%)                              |                |
| 2011                       | 126 (30%)                          | 61 (26%)                              |                |
| <b>First Line Therapy</b>  |                                    |                                       |                |
| TACE                       | NA                                 | 149 (64%)                             | NA             |
| Y90 Radioembolization      |                                    | 15 (6%)                               |                |
| Curative surgery           |                                    | 29 (13%)                              |                |
| Ablative surgery           |                                    | 16 (7%)                               |                |
| Radiation (any)            |                                    | 23 (9%)                               |                |
| Other drug therapy         |                                    | +                                     |                |
| <b>Age</b>                 |                                    |                                       |                |
| Median (Q1, Q3)            | 70 (63, 77)                        | 70 (62, 76)                           |                |
| less than 64               | 112 (27%)                          | 65 (28%)                              | 0.837*         |
| 65-74 yr                   | 168 (40%)                          | 94 (41%)                              |                |
| 75+ yr                     | 142 (34%)                          | 73 (31%)                              |                |
| <b>Sex</b>                 |                                    |                                       |                |
| Male                       | 311 (74%)                          | 154 (66%)                             | 0.048*         |
| Female                     | 111 (26%)                          | 78 (34%)                              |                |
| <b>Race</b>                |                                    |                                       |                |
| White                      | 254 (60%)                          | 127 (55%)                             | 0.282*         |
| African American           | 58 (14%)                           | 31 (13%)                              |                |
| Asian                      | 52 (12%)                           | 41 (18%)                              |                |
| Other                      | 58 (14%)                           | 33 (14%)                              |                |
| <b>Marital Status</b>      |                                    |                                       |                |
| Married                    | 192 (45%)                          | 107 (46%)                             | 0.635*         |
| Separated/Divorced/Widowed | 128 (30%)                          | 78 (34%)                              |                |
| Single                     | 77 (18%)                           | 47 (20%)                              |                |
| Other/Unknown              | 25 (6%)                            | +                                     |                |
| <b>Residence Area</b>      |                                    |                                       |                |
| Metro                      | 378 (90%)                          | 209 (90%)                             | 0.977*         |
| Urban                      | 15 (4%)                            | 23 (9%)                               |                |

|                                           |           |           |         |
|-------------------------------------------|-----------|-----------|---------|
| Rural                                     | 29 (7%)   | †         |         |
| <b>Census Tract % &lt;Poverty</b>         |           |           |         |
| 1 <sup>st</sup> Quartile (lowest)         | 104 (25%) | 63 (27%)  | 0.290*  |
| 2 <sup>nd</sup> Quartile                  | 99 (24%)  | 66 (29%)  |         |
| 3 <sup>rd</sup> Quartile                  | 109 (26%) | 54 (23%)  |         |
| 4 <sup>th</sup> Quartile (highest)        | 108 (26%) | 48 (21%)  |         |
| <b>Modified Charlson Score</b>            |           |           |         |
| 0                                         | 45 (11%)  | 24 (10%)  | 0.881*  |
| 1                                         | 77 (18%)  | 39 (17%)  |         |
| 2+                                        | 300 (71%) | 169 (73%) |         |
| <b>Mean (STD) # of Liver Comorbidites</b> | 0.7 (1.0) | 0.7 (1.1) | 0.959** |
| <b>Prior AFP Screening</b>                |           |           |         |
| 0                                         | 242 (57%) | 95 (41%)  | <.001*  |
| 1                                         | 99 (23%)  | 55 (24%)  |         |
| 2+                                        | 81 (19%)  | 82 (35%)  |         |
| <b>Hepatitis B Virus</b>                  | 41 (10%)  | 32 (14%)  | 0.113*  |
| <b>Hepatitis C Virus</b>                  | 133 (32%) | 98 (42%)  | 0.01    |
| <b>Alcoholic Cirrhosis</b>                | 58 (14%)  | 34 (15%)  | 0.75    |
| <b>Other Cause of Liver Disease</b>       | 48 (11%)  | 30 (13%)  | 0.56    |
| <b>Tumor Extent</b>                       |           |           |         |
| Multiple lesions, no vascular invasion    | 210 (50%) | 146 (63%) | 0.005*  |
| Multiple lesions with vascular invasion   | 96 (23%)  | 38 (16%)  |         |
| Extension beyond liver, NOS               | 116 (27%) | 48 (21%)  |         |

† n<11. Cell merged with above to preserve confidentiality.

**Table S3.** Effect of Initial Sorafenib Compared to No Treatment on the Risk of Death From the Time of Diagnosis of HCC. Rates of death by treatment group and the mortality Risk Ratio (RR) are shown for multiple time points from the date of diagnosis.

| Time Point | MODEL      | No Treatment |            | Sorafenib |            | Risk Difference | RR, 95% CI      | p-value |
|------------|------------|--------------|------------|-----------|------------|-----------------|-----------------|---------|
|            |            | Events/n     | % Deceased | Events/n  | % Deceased |                 |                 |         |
| 3 Months   | Unmatched  | 124/565      | 22%        | 52/242    | 21%        | 1%              | 0.98, 0.74-1.30 | 0.89    |
|            | PS Matched | 53/223       | 24%        | 51/223    | 23%        | 1%              | 0.96, 0.69-1.35 | 0.82    |
| 6 Months   | Unmatched  | 307/565      | 54%        | 124/242   | 51%        | 3%              | 0.94, 0.82-1.09 | 0.43    |
|            | PS Matched | 127/223      | 57%        | 118/223   | 53%        | 4%              | 0.93, 0.79-1.10 | 0.39    |
| 12 Months  | Unmatched  | 434/565      | 77%        | 184/242   | 76%        | 1%              | 0.99, 0.91-1.08 | 0.81    |
|            | PS Matched | 177/223      | 79%        | 174/223   | 78%        | 1%              | 0.98, 0.89-1.08 | 0.73    |

**Table S4A**, Sensitivity Analysis of the Effect of Varying Landmarks (30, 60, 90 days) on Mortality Risk Ratios Anchored at Diagnosis in the Propensity Score Matched Cohort

| Model  | Treatment group | 3 months from Diagnosis |                  | 6 months from Diagnosis |                  | 12 months from Diagnosis |                  |
|--------|-----------------|-------------------------|------------------|-------------------------|------------------|--------------------------|------------------|
|        |                 | Events/n                | RR, 95% CI       | Events/n                | RR, 95% CI       | Events/n                 | RR, 95% CI       |
| 30 day | None            | 74/150                  | 0.86, 0.68- 1.11 | 97/150                  | 1.00, 0.85- 1.18 | 119/150                  | 1.05, 0.94, 1.17 |
|        | Sorafenib       | 64/150                  |                  | 97/150                  |                  | 125/150                  |                  |
| 60 day | None            | 53/223                  | 0.96, 0.69-1.35  | 127/223                 | 0.93, 0.79-1.10  | 177/223                  | 0.98, 0.89-1.08  |
|        | Sorafenib       | 51/223                  |                  | 118/223                 |                  | 174/223                  |                  |
| 90 day | None            | 0/181                   | na               | 81/181                  | 0.86, 0.68- 1.10 | 125/181                  | 1.07, 0.94-1.22  |
|        | Sorafenib       | 0/181                   |                  | 70/181                  |                  | 134/181                  |                  |

**Table S4B**, Sensitivity Analysis of the Effect of Varying Landmarks (30, 60, 90 days) on Mortality Risk Ratios Anchored at 60 days Post-Diagnosis in the Propensity Score Matched Cohort

| Model  | Treatment group | 3 months from 60d Anchor |                 | 6 months from 60d Anchor |                 | 12 months from 60d Anchor |                 |
|--------|-----------------|--------------------------|-----------------|--------------------------|-----------------|---------------------------|-----------------|
|        |                 | Events/n                 | RR, 95% CI      | Events/n                 | RR, 95% CI      | Events/n                  | RR, 95% CI      |
| 30 day | None            | 49/150                   | 1.00, 0.72-1.38 | 64/150                   | 1.16, 0.90-1.48 | 85/150                    | 1.05, 0.86-1.27 |
|        | Sorafenib       | 49/150                   |                 | 74/150                   |                 | 89/150                    |                 |
| 60 day | None            | 113/223                  | 0.88, 0.72-1.07 | 153/223                  | 0.97, 0.86-1.11 | 188/223                   | 0.95, 0.87-1.04 |
|        | Sorafenib       | 99/223                   |                 | 149/223                  |                 | 179/223                   |                 |
| 90 day | None            | 65/181                   | 0.77, 0.57-1.04 | 98/181                   | 1.04, 0.86-1.25 | 135/181                   | 1.04, 0.92-1.16 |
|        | Sorafenib       | 50/181                   |                 | 102/181                  |                 | 140/181                   |                 |
